# Supplementary material for: The Early Silurian Gabbro in the Eastern Kunlun Orogenic Belt, Northeast Tibet: Constraints on the Proto-Tethyan Ocean Closure
Source: Preprints.org preprint supplement (doi:10.20944/preprints202008.0314.v1), 2020-08-14
Supplement: Supplementary file 1 [file Table S1.xlsx]

## Sheet: Sheet1
Samples	YJHC-1	YJHC-2	YJHC-3	YJHC-4	YJHC-5	YJHC-6	YJHC-7	YJHC-8
SiO2	51.859	51.882	48.048	51.831	54.637	48.214	55.558	51.331
TiO2	0.534	0.532	5.498	0.511	0.449	2.968	0.53	1.603
Al2O3	16.438	16.726	3.018	16.559	16.213	13.947	15.863	15.177
Fe2O3	0.806	1.161	1.396	1.023	0.837	1.284	0.852	0.705
FeO	7.52	6.58	12.82	6.87	6	9.4	5.82	7.43
MnO	0.154	0.133	0.263	0.143	0.113	0.183	0.112	0.143
MgO	7.717	7.553	12.07	7.674	6.986	8.428	6.58	8.411
CaO	10.927	10.717	13.981	11.289	9.932	11.921	9.321	10.647
Na2O	2.178	2.327	0.345	2.105	2.602	1.488	2.531	2.077
K2O	0.28	0.546	0.375	0.368	0.547	0.266	0.976	0.734
P2O5	0.045	0.033	0.055	0.033	0.033	0.1	0.044	0.045
LOI	0.89	1.16	0.47	0.92	0.96	0.52	1.14	1.04
Total	99.348	99.35	98.339	99.326	99.309	98.719	99.327	99.343
A/NK	4.23	3.785	3.1	4.288	3.327	5.098	3.039	3.604
A/CNK	0.692	0.7	0.114	0.679	0.707	0.571	0.716	0.644
A/MF	0.53	0.56	0.06	0.54	0.59	0.38	0.61	0.46
C/MF	0.64	0.65	0.5	0.67	0.66	0.6	0.65	0.59
Mg#	62.5234	63.8438	60.4507	63.7139	64.8383	58.7336	64.0384	65.0246
Rb	10.75	21.47	20.2	15.68	22.83	11.17	48.78	37.99
Ba	127.332	177.012	208.332	121.932	152.28	175.392	215.028	223.128
Th	0.531	0.497	3.962	0.774	6.418	0.806	8.027	0.971
U	0.236	0.257	0.817	0.355	1.294	0.305	1.224	0.276
Nb	1.306	1.738	1.981	1.296	2.362	5.108	2.51	2.823
Ta	0.335	0.393	0.214	0.196	0.36	0.423	0.412	0.271
Ce	11.83	16.3	21.82	16.39	32.93	17.82	38.06	19.01
Sr	339.442	315.799	38.143	298.408	303.626	276.158	275.607	281.296
Nd	7.722	10.906	19.076	10.726	21.252	12.122	22.705	11.97
P	196	144	240	144	144	436	192	196
Zr	20.398	21.244	52.076	23.218	36.002	31.208	51.982	22.09
Hf	0.9	1.35	1.17	1.17	1.35	0.99	1.62	0.81
Ti	3201	3189	32961	3063	2692	17793	3177	9610
La	5.401	8.307	7.642	7.835	12.872	8.414	21.379	9.215
Ce	11.83	16.3	21.82	16.39	32.93	17.82	38.06	19.01
Pr	1.709	2.561	3.931	2.512	4.935	2.785	5.827	2.871
Nd	7.722	10.906	19.076	10.726	21.252	12.122	22.705	11.97
Sm	2.113	2.821	5.982	2.814	5.484	3.187	5.01	2.871
Eu	1.33	1.413	0.464	1.314	1.426	1.228	1.433	1.3
Gd	2.156	2.808	6.203	2.864	5.189	3.288	4.372	2.74
Tb	0.392	0.49	1.159	0.509	0.93	0.564	0.767	0.469
Dy	2.586	3.404	7.767	3.39	6.042	3.695	4.762	3.156
Ho	0.561	0.692	1.607	0.705	1.29	0.79	1.007	0.66
Er	1.556	1.932	4.338	1.956	3.575	2.16	2.769	1.802
Tm	0.231	0.29	0.637	0.293	0.524	0.314	0.422	0.277
Yb	1.456	1.823	3.898	1.802	3.201	1.985	2.66	1.608
Lu	0.235	0.283	0.636	0.287	0.485	0.301	0.429	0.259
Y	12.34	15.55	34.98	15.41	29.51	17	22.74	14.66
ΣREE	39.278	54.03	85.16	53.397	100.135	58.653	111.602	58.208
LREE	30.105	42.308	58.915	41.591	78.899	45.556	94.414	47.237
HREE	9.173	11.722	26.245	11.806	21.236	13.097	17.188	10.971
LREE/HREE	3.28191	3.60928	2.24481	3.52287	3.71534	3.47835	5.49302	4.30562
LaN/YbN	2.66081	3.26857	1.40626	3.11878	2.88444	3.04048	5.76509	4.11064
δEu	1.90503	1.53485	0.232872	1.41505	0.817246	1.15975	0.936076	1.41702
δCe	0.954687	0.866454	0.976077	0.905804	1.013	0.902565	0.836059	0.906155
Nb/La	0.241807	0.209221	0.259225	0.165412	0.183499	0.607083	0.117405	0.306348
Nb/Ce	0.110397	0.106626	0.0907883	0.0790726	0.0717279	0.286644	0.0659485	0.148501
Nb/Ta	3.89851	4.42239	9.25701	6.61224	6.56111	12.0757	6.09223	10.417
Zr/Hf	22.6644	15.7363	44.5094	19.8444	26.6681	31.5232	32.0877	27.2716
Ce/Y	0.958671	1.04823	0.623785	1.0636	1.11589	1.04824	1.6737	1.29673
TbN/YbN	1.22378	1.22176	1.35151	1.28393	1.32061	1.2915	1.31066	1.32576
Th/Yb	0.364698	0.272628	1.01642	0.429523	2.005	0.406045	3.01767	0.603856
Th/Nb	0.406585	0.285961	2	0.597222	2.71719	0.157792	3.19801	0.34396
Ba/Th	239.797	356.161	52.5825	157.535	23.727	217.608	26.7881	229.792
Ba/La	23.5756	21.3088	27.2614	15.5625	11.8303	20.8453	10.0579	24.2136
Sr/Nd	43.9578	28.9564	1.99953	27.821	14.2869	22.7816	12.1386	23.5001
