# Supplementary material for: The Early Silurian Gabbro in the Eastern Kunlun Orogenic Belt, Northeast Tibet: Constraints on the Proto-Tethyan Ocean Closure
Source: Preprints.org preprint supplement (doi:10.20944/preprints202008.0314.v1), 2020-08-14
Supplement: Supplementary file 2 [file Table S2.xls]

## Sheet: Sheet1
Table 1. Zircon U-Pb ages for the Yuejingshan gabbro.
Spots	Pb	Th	U	Th/U	207Pb/206Pb	207Pb/206Pb	207Pb/235U	207Pb/235U	206Pb/238U	206Pb/238U	ρ	207Pb/206Pb	1s	207Pb/235U	1s	206Pb/238U	1s	Concordance
	ppm	ppm	ppm		Ratio	1sigma	Ratio	1sigma	Ratio	1sigma		(Ma)		(Ma)		(Ma)
YJHC-01	40.0801	98.5493	348.393	0.282868	0.0564831	0.00283811	0.536879	0.0251184	0.0699539	0.000965102	0.294881	472.265	111.097	436.365	16.5967	435.878	5.81469	99%
YJHC-02	78.7442	257.211	598.014	0.430109	0.0555055	0.00262546	0.537248	0.0252315	0.0702111	0.000840552	0.254912	431.53	137.947	436.609	16.6674	437.427	5.06307	99%
YJHC-03	158.008	542.833	1147.79	0.472938	0.0554558	0.00140574	0.535273	0.0128454	0.070133	0.000637169	0.378583	431.53	57.4025	435.303	8.49573	436.957	3.83827	99%
YJHC-04	153.509	527.517	1108.62	0.475832	0.0558505	0.00236399	0.539449	0.021693	0.0700275	0.000705012	0.250356	455.6	94.435	438.061	14.3092	436.321	4.24737	99%
YJHC-05	94.7789	299.345	751.13	0.398526	0.0549675	0.00165154	0.528188	0.0153919	0.0698343	0.000600705	0.295181	409.31	66.66	430.607	10.2273	435.157	3.61962	98%
YJHC-06	158.141	595.479	1086.29	0.548179	0.0549118	0.00163185	0.532564	0.0158099	0.0703165	0.000611081	0.292743	409.31	66.66	433.51	10.475	438.062	3.68049	98%
YJHC-07	108.345	366.803	814.078	0.450575	0.0560388	0.00188464	0.53979	0.0183595	0.0697593	0.000650041	0.273971	453.75	75.9175	438.286	12.1073	434.706	3.91718	99%
YJHC-08	193.344	616.88	1449.99	0.425437	0.0548507	0.00164735	0.529565	0.0155289	0.0700432	0.00064596	0.314498	405.605	63.8825	431.521	10.309	436.416	3.89155	98%
YJHC-09	101.871	356.301	716.715	0.49713	0.0552828	0.00153183	0.529492	0.0146605	0.0695741	0.000543957	0.282375	433.38	61.105	431.473	9.73298	433.59	3.27848	99%
YJHC-10	98.3611	279.09	813.102	0.343241	0.0551138	0.00188151	0.5309	0.0181486	0.0697643	0.000636653	0.266955	416.715	80.5475	432.407	12.0378	434.736	3.83648	99%
YJHC-11	127.839	430.74	978.266	0.440309	0.0548237	0.00147038	0.530255	0.0149073	0.0700095	0.000651301	0.33091	405.605	61.105	431.979	9.89189	436.213	3.92385	99%
YJHC-12	117.226	365.824	958.456	0.381681	0.0555687	0.00144093	0.534031	0.0138516	0.0698442	0.00067095	0.370361	435.23	62.03	434.482	9.1687	435.217	4.04285	99%
YJHC-13	69.638	239.592	540.607	0.44319	0.0554799	0.00189036	0.537098	0.0193197	0.0699876	0.000770224	0.305949	431.53	75.9175	436.509	12.763	436.081	4.64041	99%
YJHC-14	97.7567	320.629	751.685	0.426547	0.0560889	0.00161366	0.541891	0.0160965	0.06999	0.000726489	0.349441	457.45	62.9575	439.671	10.6004	436.095	4.37691	99%
YJHC-15	104.98	323.363	843.409	0.3834	0.056143	0.0023284	0.541777	0.0232288	0.0696995	0.000737903	0.246924	457.45	90.73	439.595	15.2992	434.345	4.44688	98%
YJHC-16	123.125	370.943	996.525	0.372236	0.0557934	0.00186288	0.537163	0.0174803	0.0696256	0.000664989	0.293496	442.64	74.0675	436.552	11.5472	433.9	4.00775	99%
YJHC-19	73.8979	229.296	596.731	0.384253	0.0546152	0.00180375	0.524787	0.0175665	0.069435	0.000645034	0.277524	398.2	78.695	428.344	11.6984	432.751	3.88818	98%
YJHC-20	136.493	501.541	945.668	0.530357	0.0551391	0.00142695	0.533713	0.013922	0.0698407	0.000583452	0.320261	416.715	54.625	434.271	9.2172	435.196	3.51564	99%
YJHC-21	106.301	362.696	809.946	0.447803	0.0556441	0.00332201	0.536989	0.0323403	0.0693735	0.00101696	0.243406	438.935	133.32	436.437	21.3682	432.38	6.13047	99%
YJHC-22	224.522	816.17	1616.77	0.504816	0.0550937	0.00130749	0.535496	0.0133217	0.0699569	0.000695239	0.399486	416.715	58.3275	435.451	8.80949	435.896	4.18876	99%
YJHC-23	147.011	538.218	1064.23	0.505734	0.0557815	0.00138995	0.538543	0.013282	0.069743	0.000595411	0.346157	442.64	55.55	437.463	8.76585	434.607	3.58803	99%
YJHC-24	94.5713	343.302	704.551	0.487264	0.0554626	0.00202753	0.532654	0.0190767	0.0694359	0.000763149	0.306879	431.53	81.475	433.569	12.639	432.756	4.60016	99%
YJHC-26	130.267	484.787	925.383	0.523877	0.0550816	0.00181499	0.53486	0.0172974	0.0700884	0.000751951	0.331744	416.715	74.0675	435.03	11.4435	436.688	4.5299	99%
YJHC-27	102.172	332.988	767.024	0.434129	0.0564367	0.00163603	0.547294	0.0157045	0.0699035	0.000619408	0.308798	477.82	32.405	443.223	10.3061	435.574	3.73207	98%
YJHC-28	89.7015	284.45	713.624	0.398599	0.0552311	0.00246577	0.538577	0.0244422	0.0703939	0.000725072	0.226962	420.42	98.1375	437.486	16.132	438.528	4.36672	99%
YJHC-29	113.983	238.542	1078.95	0.221087	0.0544668	0.00157265	0.528007	0.0156303	0.0699288	0.000940982	0.454567	390.79	64.81	430.486	10.3869	435.727	5.6695	98%
YJHC-30	77.8431	253.847	627.904	0.404276	0.0552301	0.00192718	0.536498	0.0187465	0.0700692	0.000763861	0.311986	420.42	77.77	436.113	12.3891	436.573	4.60173	99%
