# Supplementary material for: The Early Silurian Gabbro in the Eastern Kunlun Orogenic Belt, Northeast Tibet: Constraints on the Proto-Tethyan Ocean Closure
Source: Preprints.org preprint supplement (doi:10.20944/preprints202008.0314.v1), 2020-08-14
Supplement: Supplementary file 3 [file Table S3.xls]

## Sheet: Hf
Table 2. zircon Hf isotope data
Spots	176Hf/177Hf	1σ	176Lu/177Hf	1σ	176Yb/177Hf	1σ	Age (Ma)	176Hf/177Hf (t)	εHf(t)	1σ	TDM1	TDM2	fLu/Hf
YJHC-01	0.282575	1.23916e-05	0.000586073	5.10378e-06	0.0191135	0.000230104	436	0.28257	2.45112	0.69845	0.948122	1.15825	-0.982347
YJHC-02	0.282568	1.01337e-05	0.000357573	8.40409e-06	0.0115352	0.000245131	437	0.282565	2.27542	0.651632	0.952377	1.16822	-0.98923
YJHC-03	0.282566	1.17938e-05	0.000507128	3.56467e-06	0.0166756	0.000101177	437	0.282562	2.1774	0.685086	0.958246	1.17365	-0.984725
YJHC-04	0.282561	1.16414e-05	0.000790903	8.00552e-07	0.0268146	9.55781e-05	436	0.282555	1.91061	0.681251	0.971849	1.18763	-0.976178
YJHC-05	0.282568	1.22127e-05	0.000561752	1.08597e-06	0.0179628	8.7591e-05	435	0.282564	2.20461	0.693689	0.956219	1.17055	-0.98308
YJHC-06	0.282545	1.23771e-05	0.000528867	1.96468e-05	0.0172546	0.000715358	438	0.282541	1.46753	0.700865	0.987249	1.21378	-0.98407
YJHC-07	0.282554	1.22574e-05	0.000582266	3.33773e-06	0.0194503	0.000128271	435	0.282549	1.67119	0.69506	0.977461	1.20011	-0.982462
YJHC-08	0.282541	1.44792e-05	0.000696895	1.32223e-05	0.0220124	0.000404907	436	0.282536	1.22362	0.748791	0.997588	1.2257	-0.979009
YJHC-09	0.282546	1.25683e-05	0.00103522	2.90554e-05	0.0344772	0.00102123	434	0.282538	1.26535	0.706653	0.999286	1.22178	-0.968819
YJHC-10	0.282539	1.30275e-05	0.000659964	3.21015e-06	0.0208232	0.00016649	435	0.282534	1.13161	0.712386	0.99981	1.23	-0.980122
YJHC-11	0.282566	1.31356e-05	0.000594009	2.14846e-06	0.0186998	9.24897e-05	436	0.282561	2.13719	0.714768	0.960165	1.17508	-0.982108
YJHC-12	0.282561	1.35311e-05	0.000442716	5.66088e-07	0.01424	5.68136e-05	435	0.282557	1.97436	0.723604	0.963608	1.18332	-0.986665
YJHC-13	0.282554	1.32344e-05	0.000710602	7.35216e-06	0.0235464	0.000256659	436	0.282549	1.68812	0.718018	0.979484	1.19996	-0.978596
YJHC-14	0.282541	1.13731e-05	0.000515952	5.7352e-06	0.0164021	0.000217233	436	0.282536	1.25551	0.67637	0.99367	1.22394	-0.984459
YJHC-15	0.282565	1.19093e-05	0.000432805	3.7222e-06	0.0135541	0.000177695	434	0.282562	2.1152	0.687449	0.957104	1.17472	-0.986964
YJHC-16	0.282567	1.3428e-05	0.000908384	2.4972e-06	0.0290734	0.000103617	434	0.28256	2.03121	0.721509	0.967036	1.17935	-0.972639
